# Supplementary material for: Sodium glucose co-transporter-2 inhibitors in intensive care unit patients with type 2 diabetes: a pilot case control study
Source: Springer Nature journal article supplement (doi:10.1186/s13054-023-04481-y), 2023-05-16
Supplement: MOESM1 [file 25368104]

## Additional File 1

**Table S1.** Pre-ICU diabetes therapy in treatment group patients

| Diabetes therapy                                                                                        | Treatment group<br>(n = 18) |
|---------------------------------------------------------------------------------------------------------|-----------------------------|
| <b>Insulin only</b>                                                                                     | <b>4 (22.2%)</b>            |
| <b>Insulin &amp; noninsulin glucose-lowering drugs</b>                                                  | <b>4 (22.2%)</b>            |
| Insulin + Acarbose                                                                                      | 1 (5.6%)                    |
| Insulin + Biguanide + SGLT2 inhibitor (other than empagliflozin)                                        | 2 (11.1%)                   |
| Insulin + Sulfonylurea                                                                                  | 1 (5.6%)                    |
| <b>Noninsulin glucose-lowering drugs only</b>                                                           | <b>8 (44.4%)</b>            |
| Biguanide                                                                                               | 2 (11.1%)                   |
| Biguanide + Sulfonylurea                                                                                | 1 (5.6%)                    |
| Biguanide + Sulfonylurea + DDP4 inhibitor                                                               | 3 (16.7%)                   |
| Biguanide + Sulfonylurea + SGLT2 inhibitor (other than empagliflozin)                                   | 1 (5.6%)                    |
| Biguanide + DDP4 inhibitor                                                                              | 1 (5.6%)                    |
| <b>Diet control only</b>                                                                                | <b>2 (11.1%)</b>            |
| Abbreviations: SGLT2, Sodium glucose co-transporter-2 inhibitor; DDP4, Dipeptidyl peptidase-4 inhibitor |                             |

**Table S2.** Urine culture findings

| Variable                                                       | Control group<br>(n=72) | Treatment group<br>(n=18) |
|----------------------------------------------------------------|-------------------------|---------------------------|
| Positive urine culture (any pathogen)                          | 9/72 (13%)              | 4/18 (22%)                |
| Urine culture pathogen <sup>a</sup>                            |                         |                           |
| Pseudomonas aeruginosa                                         | 1                       | 1                         |
| Yeast                                                          | 0                       | 2                         |
| Candida albicans                                               | 5                       | 1                         |
| Staphylococcus haemolyticus                                    | 1                       | 0                         |
| Enterococcus faecalis                                          | 2                       | 0                         |
| Enterobacter aerogenes                                         | 1                       | 0                         |
| Klebsiella pneumoniae                                          | 1                       | 0                         |
| <sup>a</sup> More than one pathogen was found in some cultures |                         |                           |

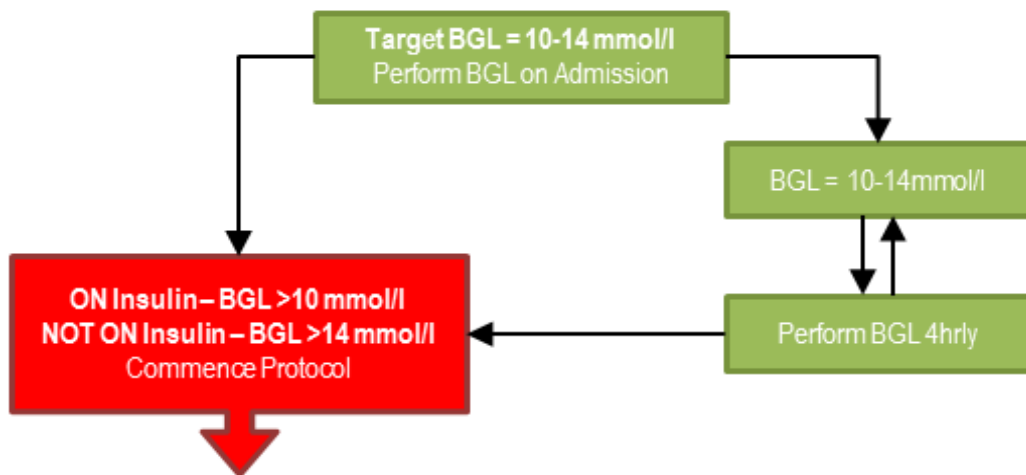

| Table: Insulin Infusion Protocol |          |                   |                                                     |            |
|----------------------------------|----------|-------------------|-----------------------------------------------------|------------|
| BGL                              | Bolus    | Starting Infusion | Subsequent Infusion                                 | Repeat BGL |
| mmol/l                           | Units IV | Units/hr          | Units/hr                                            | Hours      |
| >20                              | 6        | BPIR              | Increase by 2                                       | 1          |
| >16                              | 4        | BPIR-0.5          | Increase by 1                                       | 1          |
| >14                              | 2        | BPIR-1            | Increase by 1                                       | 1          |
| 10-14                            | 0        | BPIR-1.5          | Continue current rate                               | 1          |
| 8-10                             | 0        | 0                 | Drop by 1                                           | 1          |
| 6-8                              | 0        | 0                 | Drop by 2                                           | 1          |
| 4-6                              | 0        | 0                 | Stop                                                | 1          |
| <4                               | 0        | 0                 | Stop and administer 10ml of 50% glucose at 1 ml/min | 1          |

**Figure S1.** Liberal protocol for blood glucose management of patients with diabetes at the Austin Hospital Intensive Care Unit since 2015. Baseline pre-morbid insulin requirements (**BPIR**) is for diabetic patients who are previously receiving insulin and is the total insulin that the patient is receiving prior to their acute illness divided by 24 (hours).

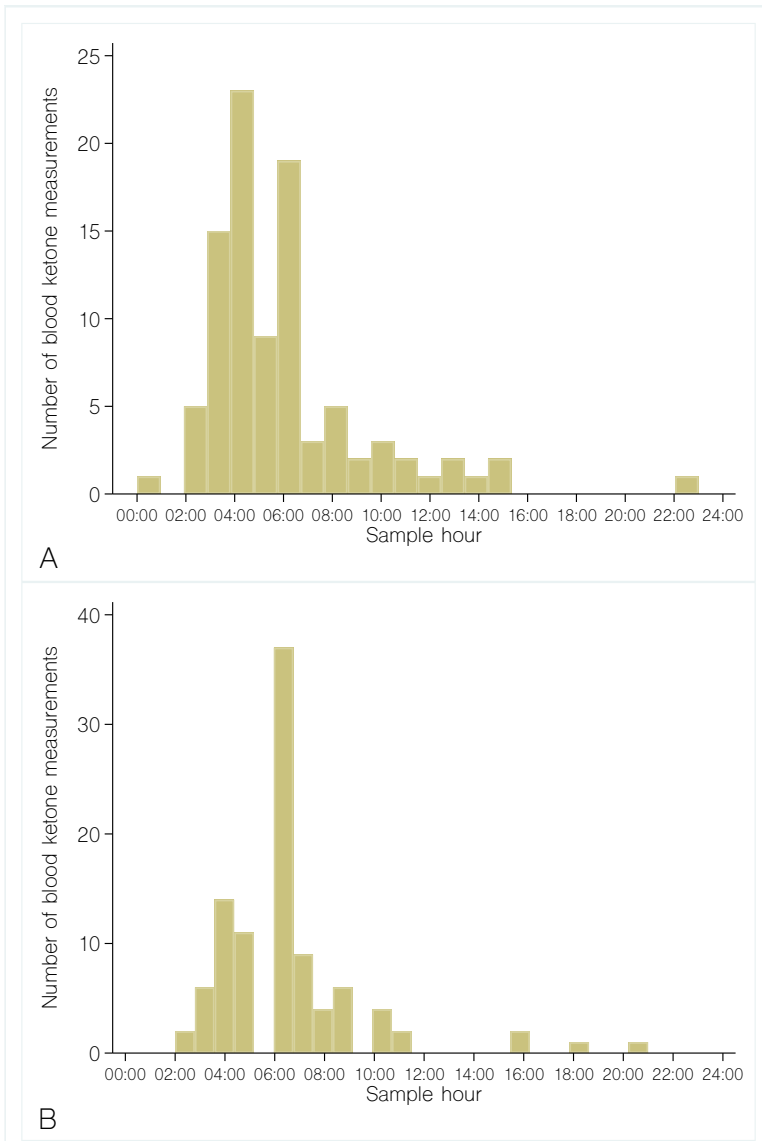

**Figure S2.** Distribution of blood ketone measurements with respect to sample time in control group patients (A) and treatment group patients (B).
